# Supplementary material for: Behavioral and Psychological Symptoms of Dementia (BPSD): Clinical Characterization and Genetic Correlates in an Italian Alzheimer’s Disease Cohort
Source: PubMed Central journal article supplement (PMC7563608; doi:10.3390/jpm10030090), 2020-08-14
Supplement: jpm-10-00090-s001.pdf [file jpm-10-00090-s001.pdf]

**Table S1. Univariate Analysis of Variance in our BPSD cohort: Tests of Between-Subjects Effects for Gender variable and BPSD endophenotypes**

| Dependent Variable: <b>Psychosis</b>              |                         |          |              |            |              |
|---------------------------------------------------|-------------------------|----------|--------------|------------|--------------|
| Source                                            | Type III Sum of Squares | df       | Mean Square  | F          | p-value      |
| Corrected Model                                   | 263.0 <sup>a</sup>      | 1        | 263.0        | 1.5        | 0.223        |
| Intercept                                         | 97533                   | 1        | 97532.5      | 553.3      | 0            |
| Gender                                            | 263                     | 1        | 263.0        | 1.5        | 0.223        |
| Error                                             | 53760                   | 305      | 176.3        |            |              |
| Total                                             | 159260                  | 307      |              |            |              |
| Corrected Total                                   | 54023                   | 306      |              |            |              |
| a. R Squared = 0.005 (Adjusted R Squared = 0.002) |                         |          |              |            |              |
| Dependent Variable: <b>Hyperactivity</b>          |                         |          |              |            |              |
| Source                                            | Type III Sum of Squares | df       | Mean Square  | F          | p-value      |
| Corrected Model                                   | 169.7 <sup>a</sup>      | 1        | 169.7        | 2.0        | 0.155        |
| Intercept                                         | 37506.1                 | 1        | 37506.1      | 449.0      | 0            |
| Gender                                            | 169.7                   | 1        | 169.7        | 2.0        | 0.155        |
| Error                                             | 25562.9                 | 306      | 83.5         |            |              |
| Total                                             | 65847.0                 | 308      |              |            |              |
| Corrected Total                                   | 25732.6                 | 307      |              |            |              |
| a. R Squared = 0.007 (Adjusted R Squared = 0.003) |                         |          |              |            |              |
| Dependent Variable: <b>Moods</b>                  |                         |          |              |            |              |
| Source                                            | Type III Sum of Squares | df       | Mean Square  | F          | p-value      |
| Corrected Model                                   | 410.0 <sup>a</sup>      | 1        | 410.0        | 4.7        | 0.032        |
| Intercept                                         | 16003.8                 | 1        | 16003.8      | 181.8      | 0            |
| <b>Gender</b>                                     | <b>410.0</b>            | <b>1</b> | <b>410.0</b> | <b>4.7</b> | <b>0.032</b> |
| Error                                             | 26757.1                 | 304      | 88.0         |            |              |
| Total                                             | 47008.0                 | 306      |              |            |              |
| Corrected Total                                   | 27167.2                 | 305      |              |            |              |
| a. R Squared = 0.015 (Adjusted R Squared = 0.012) |                         |          |              |            |              |
| Dependent Variable: <b>Frontal</b>                |                         |          |              |            |              |
| Source                                            | Type III Sum of Squares | df       | Mean Square  | F          | p-value.     |
| Corrected Model                                   | 13.2 <sup>a</sup>       | 1        | 13.2         | 1.8        | 0.185        |
| Intercept                                         | 263.3                   | 1        | 263.3        | 35.4       | 0            |
| Gender                                            | 13.2                    | 1        | 13.2         | 1.8        | 0.185        |
| Error                                             | 2269.1                  | 305      | 7.4          |            |              |
| Total                                             | 2620.0                  | 307      |              |            |              |
| Corrected Total                                   | 2282.3                  | 306      |              |            |              |
| a. R Squared = 0.006 (Adjusted R Squared = 0.003) |                         |          |              |            |              |

**Table S2. Univariate Analysis of Variance in our BPSD cohort: Tests of Between-Subjects Effects for Age variable and BPSD endophenotypes**

| Dependent Variable: <b>Psychosis</b>               |                         |     |             |     |       |
|----------------------------------------------------|-------------------------|-----|-------------|-----|-------|
| Source                                             | Type III Sum of Squares | df  | Mean Square | F   | Sig.  |
| Corrected Model                                    | 0.3 <sup>a</sup>        | 1   | 0.3         | 0.0 | 0.968 |
| Intercept                                          | 718.3                   | 1   | 718.3       | 4.1 | 0.045 |
| Age                                                | 0.3                     | 1   | 0.3         | 0.0 | 0.968 |
| Error                                              | 54022.4                 | 305 | 177.1       |     |       |
| Total                                              | 159260.0                | 307 |             |     |       |
| Corrected Total                                    | 54022.7                 | 306 |             |     |       |
| a. R Squared = 0.000 (Adjusted R Squared = -0.003) |                         |     |             |     |       |
| Dependent Variable: <b>Hyperactivity</b>           |                         |     |             |     |       |
| Source                                             | Type III Sum of Squares | df  | Mean Square | F   | Sig.  |
| Corrected Model                                    | 85.3 <sup>a</sup>       | 1   | 85.3        | 1.0 | 0.314 |
| Intercept                                          | 693.3                   | 1   | 693.3       | 8.3 | 0.004 |
| Age                                                | 85.3                    | 1   | 85.3        | 1.0 | 0.314 |
| Error                                              | 25647.4                 | 306 | 83.8        |     |       |
| Total                                              | 65847.0                 | 308 |             |     |       |
| Corrected Total                                    | 25732.6                 | 307 |             |     |       |
| a. R Squared = 0.003 (Adjusted R Squared = 0.000)  |                         |     |             |     |       |
| Dependent Variable: <b>Moods</b>                   |                         |     |             |     |       |
| Source                                             | Type III Sum of Squares | df  | Mean Square | F   | Sig.  |
| Corrected Model                                    | 11.5 <sup>a</sup>       | 1   | 11.5        | 0.1 | 0.720 |
| Intercept                                          | 232.9                   | 1   | 232.9       | 2.6 | 0.107 |
| Age                                                | 11.5                    | 1   | 11.5        | 0.1 | 0.720 |
| Error                                              | 27155.7                 | 304 | 89.3        |     |       |
| Total                                              | 47008.0                 | 306 |             |     |       |
| Corrected Total                                    | 27167.2                 | 305 |             |     |       |
| a. R Squared = 0.000 (Adjusted R Squared = -0.003) |                         |     |             |     |       |
| Dependent Variable: <b>Frontal</b>                 |                         |     |             |     |       |
| Source                                             | Type III Sum of Squares | df  | Mean Square | F   | Sig.  |
| Corrected Model                                    | 4.1 <sup>a</sup>        | 1   | 4.1         | 0.5 | 0.461 |
| Intercept                                          | 12.7                    | 1   | 12.7        | 1.7 | 0.194 |
| Age                                                | 4.1                     | 1   | 4.1         | 0.5 | 0.461 |
| Error                                              | 2278.2                  | 305 | 7.5         |     |       |
| Total                                              | 2620.0                  | 307 |             |     |       |
| Corrected Total                                    | 2282.3                  | 306 |             |     |       |
| a. R Squared = 0.002 (Adjusted R Squared = -0.001) |                         |     |             |     |       |

**Table S3. Hosmer-Lemeshow goodness of fit test in single BSPD symptoms**

| Symptoms                         | Chi-Square | df | p-value |
|----------------------------------|------------|----|---------|
| Agitation                        | 40.441     | 35 | 0.243   |
| Irritability                     | 52.031     | 36 | 0.041   |
| Night-time behavior disturbances | 41.897     | 36 | 0.230   |
| Aberrant motor behavior          | 28.209     | 35 | 0.785   |
| Apathy                           | 36.047     | 36 | 0.466   |
| Delusions                        | 35.088     | 35 | 0.464   |
| Anxiety                          | 42.725     | 36 | 0.205   |
| Depression                       | 36.287     | 36 | 0.455   |
| Hallucination                    | 27.670     | 36 | 0.839   |
| Appetite and eating disturbances | 38.262     | 35 | 0.324   |
| Disinhibition                    | 31.641     | 36 | 0.676   |
| Euphoria                         | 15.564     | 35 | 0.998   |

Nominal Regression, Stepwise Method: Forward Stepwise: Pearson chi-square analysis

**Table S4. Stepwise multiple logistic regression for “Psychosis” endophenotype**

**Node 1.**

**Descriptive Statistics**

|                       | Mean  | Std. Deviation | N   |
|-----------------------|-------|----------------|-----|
| Psychosis             | 18.51 | 13.287         | 307 |
| APOEcarE4             | 0.53  | 0.500          | 307 |
| MTHFR_677T-carriers   | 0.31  | 0.462          | 307 |
| MTHFR_677C-carriers   | 0.17  | 0.379          | 307 |
| MTHFR_1298A-carriers  | 0.09  | 0.288          | 307 |
| MTHFR_1298C-carriers  | 0.48  | 0.500          | 307 |
| COMT_V158M-A-carriers | 0.28  | 0.448          | 307 |
| COMT_V158M-G-carriers | 0.20  | 0.402          | 307 |

**Variables Entered/Removed<sup>a</sup>**

| Model | Variables Entered | Variables Removed | Method                                                                                        |
|-------|-------------------|-------------------|-----------------------------------------------------------------------------------------------|
| 1     | APOEcarE4         | .                 | Stepwise (Criteria: Probability-of-F-to-enter <= 0.050. Probability-of-F-to-remove >= 0.100). |

a. Dependent Variable: Psychosis

**Model Summary**

| Model | R                  | R Square | Adjusted R Square | Std. Error of the Estimate | Change Statistics |          |     |     |               |
|-------|--------------------|----------|-------------------|----------------------------|-------------------|----------|-----|-----|---------------|
|       |                    |          |                   |                            | R Square Change   | F Change | df1 | df2 | Sig. F Change |
| 1     | 0.155 <sup>a</sup> | 0.024    | 0.021             | 13.148                     | 0.024             | 7.502    | 1   | 305 | 0.007         |

a. Predictors: (Constant). APOEcarE4

**Node 2.**

**Descriptive Statistics**

|                       | Mean  | Std. Deviation | N   |
|-----------------------|-------|----------------|-----|
| Psychosis             | 16.58 | 12.051         | 163 |
| MTHFR_677T-carriers   | 0.31  | 0.465          | 163 |
| MTHFR_677C-carriers   | 0.16  | 0.367          | 163 |
| MTHFR_1298A-carriers  | 0.10  | 0.307          | 163 |
| MTHFR_1298C-carriers  | 0.48  | 0.501          | 163 |
| COMT_V158M-A-carriers | 0.26  | 0.439          | 163 |
| COMT_V158M-G-carriers | 0.21  | 0.412          | 163 |

**Variables Entered/Removed<sup>a</sup>**

| Model | Variables Entered   | Variables Removed | Method                                                                                        |
|-------|---------------------|-------------------|-----------------------------------------------------------------------------------------------|
| 1     | MTHFR_677T-carriers | .                 | Stepwise (Criteria: Probability-of-F-to-enter <= 0.050. Probability-of-F-to-remove >= 0.100). |

a. Dependent Variable: Psychosis

**Model Summary**

| Model | R                  | R Square | Adjusted R Square | Std. Error of the Estimate | Change Statistics |          |     |     |               |
|-------|--------------------|----------|-------------------|----------------------------|-------------------|----------|-----|-----|---------------|
|       |                    |          |                   |                            | R Square Change   | F Change | df1 | df2 | Sig. F Change |
| 1     | 0.201 <sup>a</sup> | 0.040    | 0.034             | 11.842                     | 0.040             | 6.761    | 1   | 161 | 0.010         |

a. Predictors: (Constant). MTHFR\_677T-carriers

**Node 3.**

**Descriptive Statistics**

|                       | Mean  | Std. Deviation | N  |
|-----------------------|-------|----------------|----|
| Psychosis             | 20.16 | 13.435         | 51 |
| MTHFR_1298A-carriers  | 0.33  | 0.476          | 51 |
| MTHFR_1298C-carriers  | 0.14  | 0.348          | 51 |
| COMT_V158M-A-carriers | 0.20  | 0.401          | 51 |
| COMT_V158M-G-carriers | 0.18  | 0.385          | 51 |

**Variables Entered/Removed<sup>a</sup>**

| Model | Variables Entered    | Variables Removed | Method                                                                                        |
|-------|----------------------|-------------------|-----------------------------------------------------------------------------------------------|
| 1     | MTHFR_1298A-carriers | .                 | Stepwise (Criteria: Probability-of-F-to-enter <= 0.050. Probability-of-F-to-remove >= 0.100). |

a. Dependent Variable: Psychosis

**Model Summary**

| Model | R                  | R Square | Adjusted R Square | Std. Error of the Estimate | Change Statistics |          |     |     |               |
|-------|--------------------|----------|-------------------|----------------------------|-------------------|----------|-----|-----|---------------|
|       |                    |          |                   |                            | R Square Change   | F Change | df1 | df2 | Sig. F Change |
| 1     | 0.315 <sup>a</sup> | 0.099    | 0.081             | 12.881                     | 0.099             | 5.389    | 1   | 49  | 0.024         |

a. Predictors: (Constant), MTHFR\_1298A-carriers

**Table S5. Stepwise multiple logistic regression for “Hyperactivity” endophenotype**

**Node 1.**

**Descriptive Statistics**

|                       | Mean  | Std. Deviation | N   |
|-----------------------|-------|----------------|-----|
| Hyperactivity         | 11.41 | 9.155          | 308 |
| APOE_E4-carriers      | 0.53  | 0.500          | 308 |
| MTHFR_677T-carriers   | 0.31  | 0.461          | 308 |
| MTHFR_677C-carriers   | 0.17  | 0.378          | 308 |
| MTHFR_1298A-carriers  | 0.09  | 0.288          | 308 |
| MTHFR_1298C-carriers  | 0.47  | 0.500          | 308 |
| COMT_V158M-A-carriers | 0.28  | 0.448          | 308 |
| COMT_V158M-G-carriers | 0.20  | 0.402          | 308 |

**Variables Entered/Removed<sup>a</sup>**

| Model | Variables Entered | Variables Removed | Method                                                                                      |
|-------|-------------------|-------------------|---------------------------------------------------------------------------------------------|
| 1     | APOE_E4-carriers  | .                 | Stepwise (Criteria: Probability-of-F-to-enter <= .050. Probability-of-F-to-remove >= .100). |

a. Dependent Variable: Hyperactivity

**Model Summary**

| Model | R                  | R Square | Adjusted R Square | Std. Error of the Estimate | Change Statistics |          |     |     |               |
|-------|--------------------|----------|-------------------|----------------------------|-------------------|----------|-----|-----|---------------|
|       |                    |          |                   |                            | R Square Change   | F Change | df1 | df2 | Sig. F Change |
| 1     | 0.188 <sup>a</sup> | 0.035    | 0.032             | 9.007                      | 0.035             | 11.214   | 1   | 306 | 0.001         |

a. Predictors: (Constant). APOE\_E4-carriers

**Node 2.**

**Descriptive Statistics**

|                       | Mean | Std. Deviation | N   |
|-----------------------|------|----------------|-----|
| Hyperactivity         | 9.79 | 8.528          | 163 |
| MTHFR_677T-carriers   | 0.31 | 0.465          | 163 |
| MTHFR_677C-carriers   | 0.16 | 0.367          | 163 |
| MTHFR_1298A-carriers  | 0.10 | 0.307          | 163 |
| MTHFR_1298C-carriers  | 0.48 | 0.501          | 163 |
| COMT_V158M-A-carriers | 0.26 | 0.439          | 163 |
| COMT_V158M-G-carriers | 0.21 | 0.412          | 163 |

**Variables Entered/Removed<sup>a</sup>**

| Model | Variables Entered   | Variables Removed | Method                                                                                      |
|-------|---------------------|-------------------|---------------------------------------------------------------------------------------------|
| 1     | MTHFR_677T-carriers | .                 | Stepwise (Criteria: Probability-of-F-to-enter <= .050. Probability-of-F-to-remove >= .100). |

a. Dependent Variable: Hyperactivity

**Model Summary**

| Model | R                  | R Square | Adjusted R Square | Std. Error of the Estimate | Change Statistics |          |     |     |               |
|-------|--------------------|----------|-------------------|----------------------------|-------------------|----------|-----|-----|---------------|
|       |                    |          |                   |                            | R Square Change   | F Change | df1 | df2 | Sig. F Change |
| 1     | 0.180 <sup>a</sup> | 0.032    | 0.026             | 8.414                      | 0.032             | 5.389    | 1   | 161 | 0.022         |

a. Predictors: (Constant). MTHFR\_677T-carriers



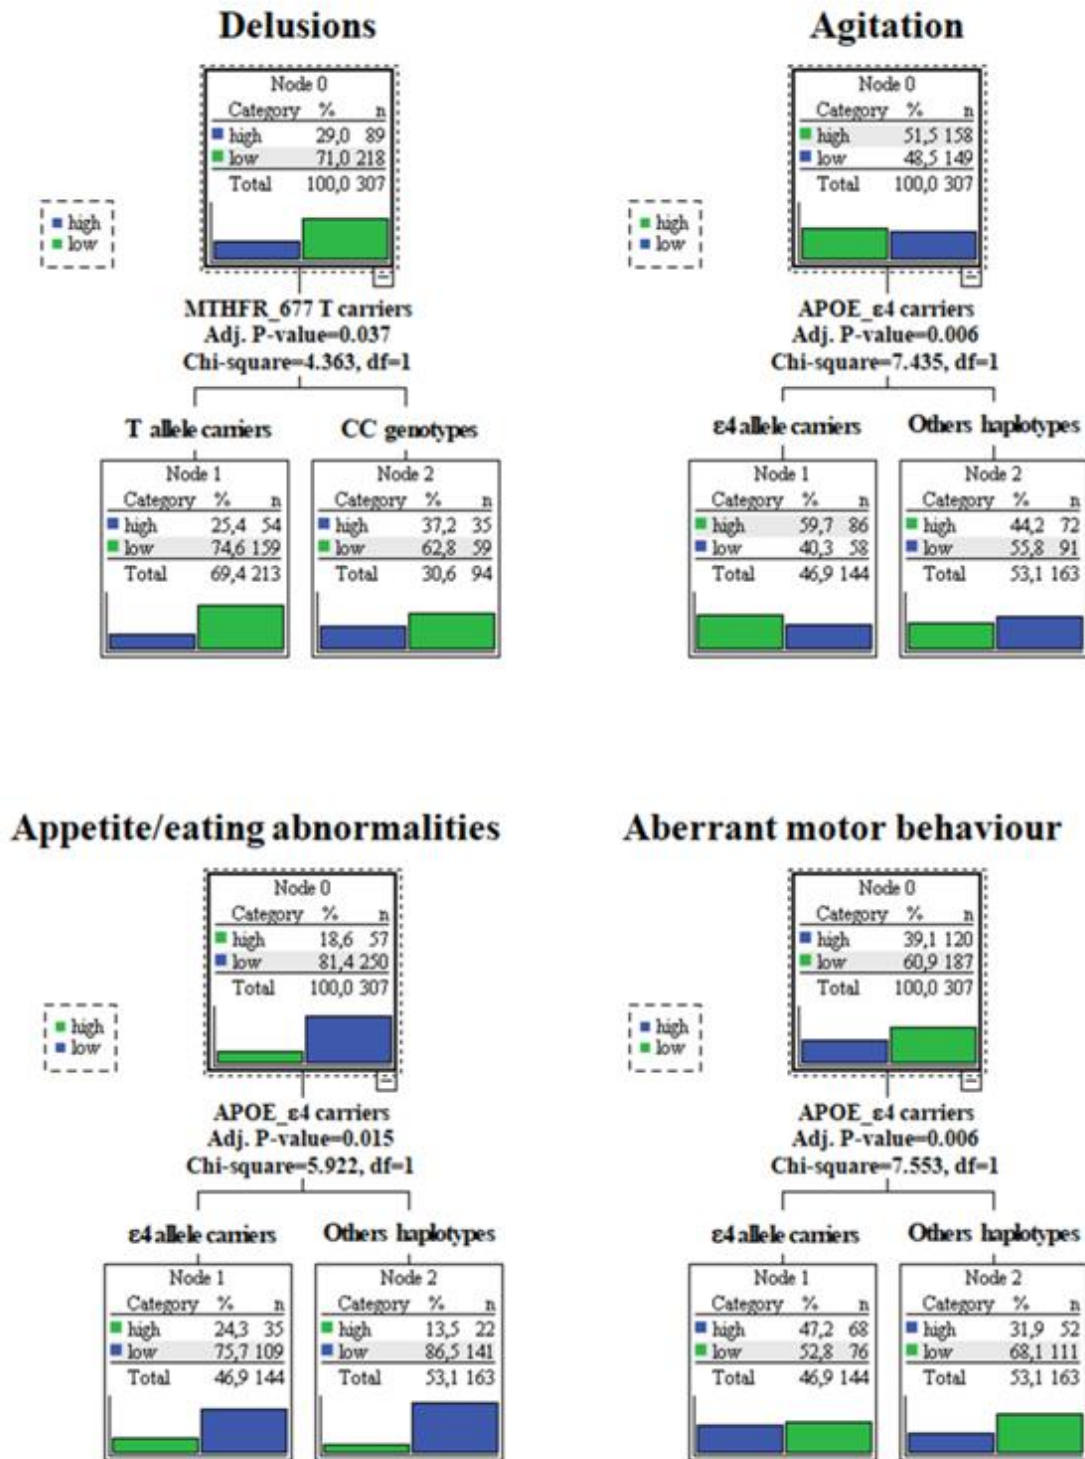

**Figure S1.** Exhaustive CHAID data mining algorithm analysis results (“gene x gene” interaction) for single BPSD symptoms according to different values of “severity\* frequencies”
